# Supplementary material for: Inter-relationships among neutrophilic inflammation, air trapping and future exacerbation in COPD: an analysis of ECOPD study
Source: HighWire-hosted journal article supplement (doi:10.1136/bmjresp-2022-001597), 2023-04-01
Supplement: bmjresp-2022-001597supp001_data_supplement.pdf [file bmjresp-2022-001597supp001_data_supplement.pdf]

**Table S1. The association of covariates in logistical regression model with future exacerbation**

| Variables                                                                 | Exacerbation $\geq 1/y$<br>(%) | P value          | Severe<br>exacerbation (%) | P value          | Exacerbation $\geq 2/y$<br>(%) | P value          |
|---------------------------------------------------------------------------|--------------------------------|------------------|----------------------------|------------------|--------------------------------|------------------|
| <b>All patients</b>                                                       |                                |                  |                            |                  |                                |                  |
| Male (vs. female)                                                         | 0.51 (0.14-1.79)               | 0.304            | 0.45 (0.1-1.88)            | 0.288            | 0.49 (0.02-6.16)               | 0.592            |
| Age (per years)                                                           | 0.99 (0.96-1.02)               | 0.533            | 0.99 (0.96-1.03)           | 0.728            | 0.99 (0.95-1.04)               | 0.757            |
| BMI (per kg/m <sup>2</sup> )                                              | 0.99 (0.93-1.06)               | 0.83             | 0.98 (0.91-1.05)           | 0.491            | 0.98 (0.88-1.09)               | 0.715            |
| Exacerbation in the preceding year<br>(Yes vs. No)                        | <b>3.02 (1.82-5.05)</b>        | <b>&lt;0.001</b> | <b>3.22 (1.91-5.43)</b>    | <b>&lt;0.001</b> | <b>3.61 (1.8-7.12)</b>         | <b>&lt;0.001</b> |
| Smoking status (%)                                                        |                                |                  |                            |                  |                                |                  |
| Never smoked                                                              | 1                              |                  | 1                          |                  | 1                              |                  |
| Former smoking                                                            | 1.36 (0.46-4.51)               | 0.595            | 1.91 (0.56-8.06)           | 0.332            | 3.36 (0.49-70.06)              | 0.297            |
| Current smoking                                                           | 1.24 (0.45-3.89)               | 0.694            | 1.45 (0.46-5.84)           | 0.557            | 2.59 (0.41-52.26)              | 0.402            |
| Smoking index (per pack-yr)                                               | 1.00 (0.99-1.01)               | 0.843            | 1.00 (0.99-1.01)           | 0.68             | 1.00 (0.98-1.01)               | 0.439            |
| FEV <sub>1</sub> % pred (per percentage)                                  | 0.99 (0.98-1.00)               | 0.098            | 0.99 (0.98-1.00)           | 0.065            | 0.99 (0.97-1.00)               | 0.119            |
| High neutrophil proportion level (vs.<br>low neutrophil proportion level) | 1.41 (0.95-2.09)               | 0.090            | <b>1.68 (1.09-2.62)</b>    | <b>0.020</b>     | 1.28 (0.67-2.51)               | 0.460            |
| Inhaled medications (Yes vs No)                                           | 1.43 (0.69-2.92)               | 0.329            | 1.66 (0.77-3.44)           | 0.182            | 1.59 (0.54-4.07)               | 0.367            |
| <b>Patients with Air trapping</b>                                         |                                |                  |                            |                  |                                |                  |
| Male (vs. female)                                                         | 0.4 (0.04-3.19)                | 0.402            | 1.11 (0.09-12.83)          | 0.932            | -                              | 0.989            |
| Age (per years)                                                           | 0.99 (0.95-1.03)               | 0.468            | 1.00 (0.95-1.04)           | 0.857            | 1.01 (1.07-1.03)               | 0.794            |
| BMI (per kg/m <sup>2</sup> )                                              | 0.96 (0.88-1.04)               | 0.327            | 0.96 (0.88-1.05)           | 0.413            | 1.03 (1.16-1.04)               | 0.647            |
| Exacerbation in the preceding year<br>(Yes vs. No)                        | <b>2.23 (1.24-4.02)</b>        | <b>0.007</b>     | <b>2.72 (1.49-4.97)</b>    | <b>0.001</b>     | <b>3.64 (7.8-4.02)</b>         | <b>0.001</b>     |
| Smoking status (%)                                                        |                                |                  |                            |                  |                                |                  |
| Never smoked                                                              | 1                              |                  | 1                          |                  | 1                              |                  |
| Former smoking                                                            | 3.58 (0.71-28.36)              | 0.159            | 2.64 (0.51-21.56)          | 0.293            | -                              | 0.989            |
| Current smoking                                                           | 2.18 (0.46-16.75)              | 0.375            | 1.49 (0.3-11.81)           | 0.656            | -                              | 0.989            |
| Smoking index (per pack-yr)                                               | 0.99 (0.98-1.00)               | 0.125            | 0.99 (0.98-1.00)           | 0.221            | 0.99 (1.01-1)                  | 0.351            |

|                                                                        |                          |              |                         |              |                          |              |
|------------------------------------------------------------------------|--------------------------|--------------|-------------------------|--------------|--------------------------|--------------|
| FEV <sub>1</sub> % pred (per percentage)                               | 0.99 (0.97-1.00)         | 0.069        | 0.99 (0.97-1.00)        | 0.070        | 0.98 (1-1)               | 0.079        |
| High neutrophil proportion level (vs. low neutrophil proportion level) | <b>1.69 (1.01-2.84)</b>  | <b>0.046</b> | <b>1.79 (1.03-3.15)</b> | <b>0.042</b> | 1.04 (2.28-2.84)         | 0.912        |
| Inhaled medications (Yes vs No)                                        | 1.97 (0.86-4.54)         | 0.108        | 1.96 (0.83-4.55)        | 0.119        | 1.48 (4.23-4.54)         | 0.493        |
| <b>Non-Air trapping group</b>                                          |                          |              |                         |              |                          |              |
| Male (vs. female)                                                      | 0.60 (0.11-3.00)         | 0.540        | 0.27 (0.03-1.72)        | 0.194        | 1.5 (0.04-47.83)         | 0.194        |
| Age (per years)                                                        | 0.99 (0.94-1.05)         | 0.792        | 0.99 (0.93-1.05)        | 0.66         | 0.94 (0.85-1.04)         | 0.66         |
| BMI (per kg/m <sup>2</sup> )                                           | 1.04 (0.92-1.17)         | 0.508        | 0.98 (0.86-1.12)        | 0.756        | 0.86 (0.65-1.08)         | 0.756        |
| Exacerbation in the preceding year (Yes vs. No)                        | <b>9.01 (2.78-35.48)</b> | <b>0.001</b> | <b>5.66 (1.77-18.5)</b> | <b>0.003</b> | <b>2.23 (0.23-13.02)</b> | <b>0.003</b> |
| Smoking status (%)                                                     |                          |              |                         |              |                          |              |
| Never smoked                                                           | <b>1</b>                 |              | <b>1</b>                |              | <b>1</b>                 |              |
| Former smoking                                                         | 0.37 (0.06-2.27)         | 0.265        | 0.79 (0.1-8.57)         | 0.832        | 0.66 (0.03-27.21)        | 0.832        |
| Current smoking                                                        | 0.76 (0.18-3.79)         | 0.719        | 1.31 (0.23-11.64)       | 0.782        | 0.51 (0.04-15.76)        | 0.782        |
| Smoking index (per pack-yr)                                            | 1.01 (1.00-1.02)         | 0.252        | 1.01 (0.99-1.02)        | 0.446        | 1.01 (0.98-1.03)         | 0.446        |
| FEV <sub>1</sub> % pred (per percentage)                               | 1.00 (0.98-1.03)         | 0.794        | 1 (0.97-1.02)           | 0.723        | 1.01 (0.97-1.06)         | 0.723        |
| High neutrophil proportion level (vs. low neutrophil proportion level) | 0.97 (0.47-1.96)         | 0.937        | 1.45 (0.65-3.19)        | 0.359        | 1.95 (0.47-8.51)         | 0.359        |
| Inhaled medications (Yes vs No)                                        | 0.61 (0.07-3.10)         | 0.590        | 0.98 (0.12-5.12)        | 0.981        | 2.3 (0.08-22.33)         | 0.981        |

The effect values for clinical outcomes are obtained by using the linear regression model. All models are adjusted for age, sex, body mass index, smoking status, smoking index, prior exacerbation, FEV<sub>1</sub>% pred, inhaled medication, and levels of sputum neutrophil proportion. BMI=body mass index; FEV<sub>1</sub>=Forced Expiratory Volume in one second.
